# Supplementary material
Source: PubMed Central journal article supplement (PMC3553884)
Supplement: JCM.02482-12_zjm999092215so1.pdf [file JCM.02482-12_zjm999092215so1.pdf]

Supplemental Figure. Concordance of sonication and vortexing fluid cultures in prosthetic joint infection and aseptic failure.

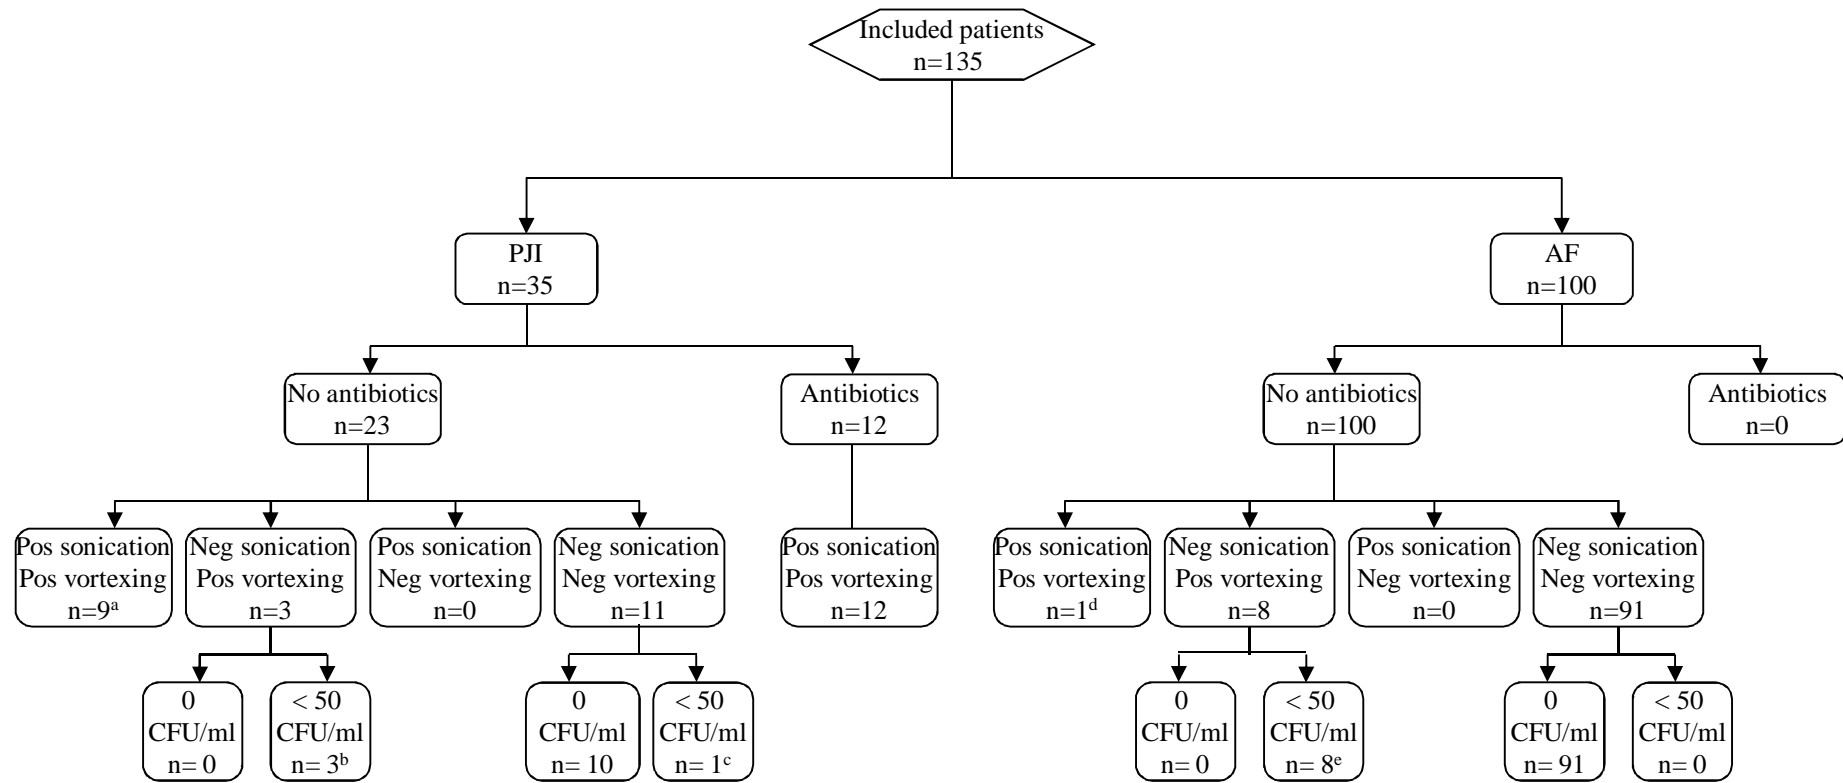

**Note.** PJI, prosthetic joint infection; AF, aseptic failure; Pos, positive; Neg, negative.

<sup>a</sup>Eight concordant cases and 1 discordant case (additional *P.mirabilis* detected by sonication fluid culture).

<sup>b</sup>Coagulase-negative staphylococci (n=3).

<sup>c</sup>*P.multocida* (n=1).

<sup>d</sup>*Corynebacterium* sp. (n=1)

<sup>e</sup>*Propionibacterium* sp. (n=7), coagulase-negative *staphylococcus* (n=1)
